# Supplementary material for: Cholesterol appended bis-1,2,3-triazoles as simple supramolecular gelators for the naked eye detection of Ag+, Cu2+ and Hg2+ ions
Source: Royal Society of Chemistry journal article supplement (doi:10.1039/c5nj02771c), 2016-01-01

## Electronic Supporting Information

### Cholesterol appended bis-1,2,3-triazoles as simple supramolecular gelators for naked eye detection of Ag<sup>+</sup>, Cu<sup>2+</sup> and Hg<sup>2+</sup> ions

Kumares Ghosh\*, Atanu Panja and Santanu Panja

*Department of Chemistry, University of Kalyani, Kalyani-741235, India.*

*Email: ghosh\_k2003@yahoo.co.in*

**Table S1.** Results of gelation test for **1-5**.

| Solvents                                          | 1  | 2  | 3  | 4  | 5  |
|---------------------------------------------------|----|----|----|----|----|
| CHCl <sub>3</sub>                                 | S  | S  | S  | S  | S  |
| 2% CH <sub>3</sub> OH in CHCl <sub>3</sub>        | S  | S  | S  | S  | S  |
| CHCl <sub>3</sub> : CH <sub>3</sub> OH (1:1, v/v) | P  | P  | P  | PG | S  |
| CHCl <sub>3</sub> : CH <sub>3</sub> OH (2:1, v/v) | G  | G  | G  | S  | S  |
| CHCl <sub>3</sub> : CH <sub>3</sub> OH (3:1, v/v) | S  | S  | S  | S  | S  |
| CHCl <sub>3</sub> : Pet ether (1:1, v/v)          | PS | PS | PS | S  | S  |
| CH <sub>3</sub> COCH <sub>3</sub>                 | I  | I  | I  | PS | S  |
| DMF                                               | PG | PG | PG | PS | S  |
| DMF:H <sub>2</sub> O (1:1, v/v)                   | P  | P  | P  | P  | P  |
| CH <sub>3</sub> CN                                | I  | I  | I  | PS | S  |
| CH <sub>3</sub> CN : CHCl <sub>3</sub> (1:1, v/v) | S  | S  | S  | S  | S  |
| CH <sub>3</sub> OH                                | I  | I  | PS | PS | PS |
| CH <sub>3</sub> OH :H <sub>2</sub> O (1:1, v/v)   | I  | I  | I  | I  | P  |
| DMSO                                              | I  | I  | PS | PS | S  |
| 1% DMSO in CH <sub>3</sub> CN                     | I  | I  | I  | PS | S  |
| Diethyl ether                                     | I  | I  | PS | PS | S  |
| Cyclohexane                                       | I  | I  | I  | PS | S  |

S = solution, G = gel (minimum gelation concentration; **1** = 14.6 mg/mL, **2** = 13.5 mg/mL, **3** = 12.2 mg/mL), I= insoluble, PG = partial gelation, PS = partial soluble, P = precipitation.

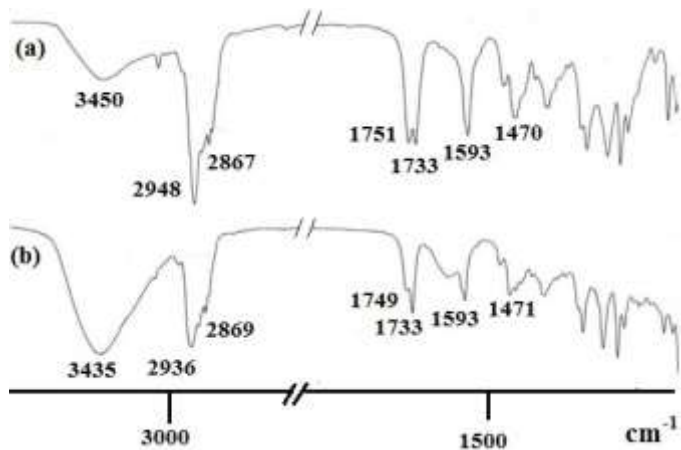

Fig. S1. Partial FTIR spectra of (a) 1 (amorphous) and (b) 1 in gel state.

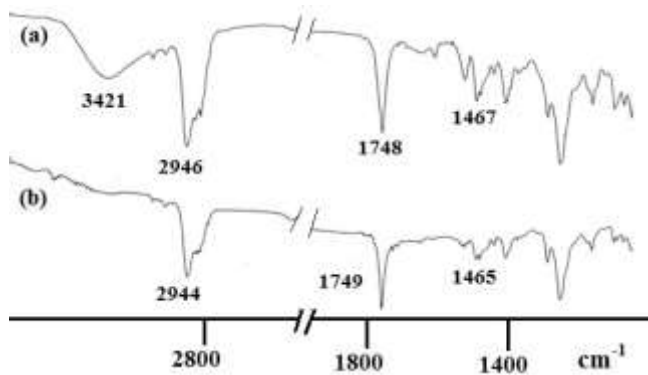

Fig. S2. Partial FTIR spectra of (a) 2 (amorphous) and (b) 2 in gel state.

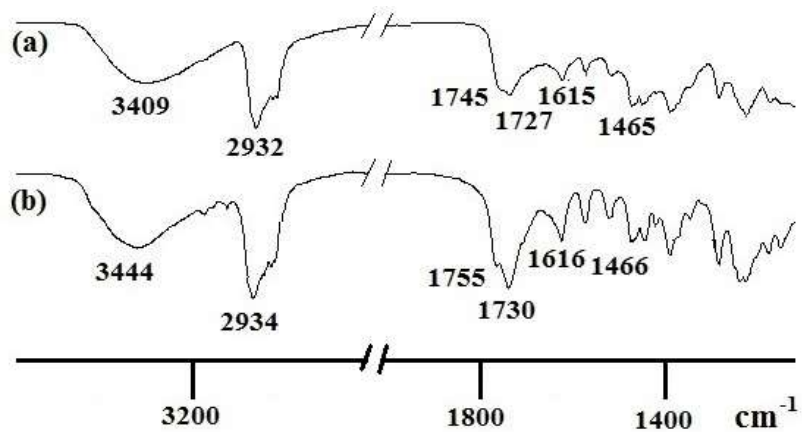

Fig. S3. Partial FTIR spectra of (a) 3 (amorphous) and (b) 3 in gel state.

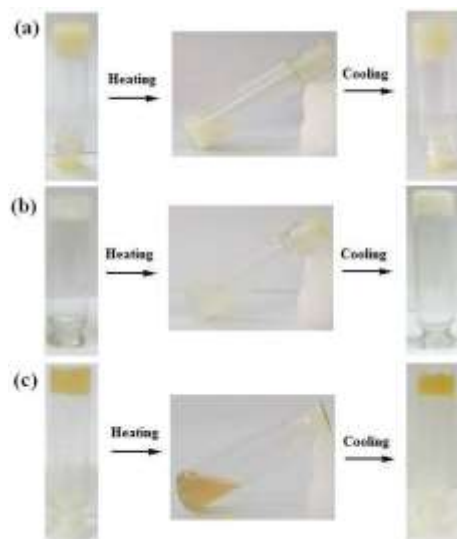

**Fig. S4.** Pictorial representation of the thermo reversibility of the  $\text{CHCl}_3:\text{CH}_3\text{OH}$  (2:1, v/v) gels of (a) **1**, (b) **2** and (c) **3**.

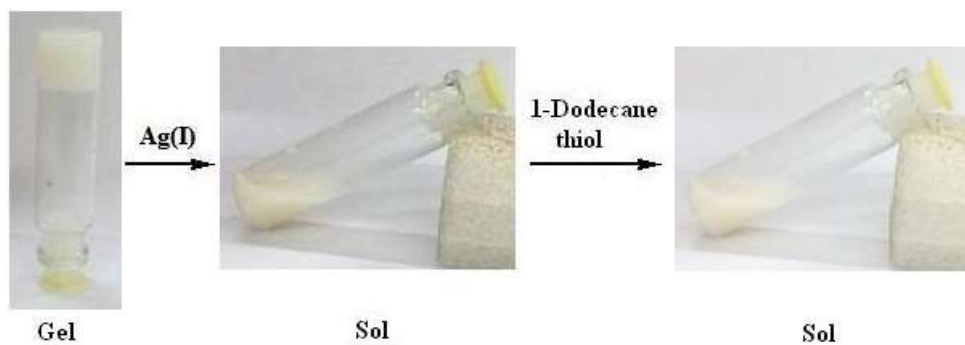

**Fig. S5.** Pictorial representation of  $\text{Ag}^+$  ( $c = 0.2 \text{ M}$ , 5 equiv.) induced broken gels of **2** [15 mg/ mL in  $\text{CHCl}_3:\text{MeOH}$  (2:1, v/v)] upon addition of 1-Dodecanethiol (in excess amounts) after 4h.

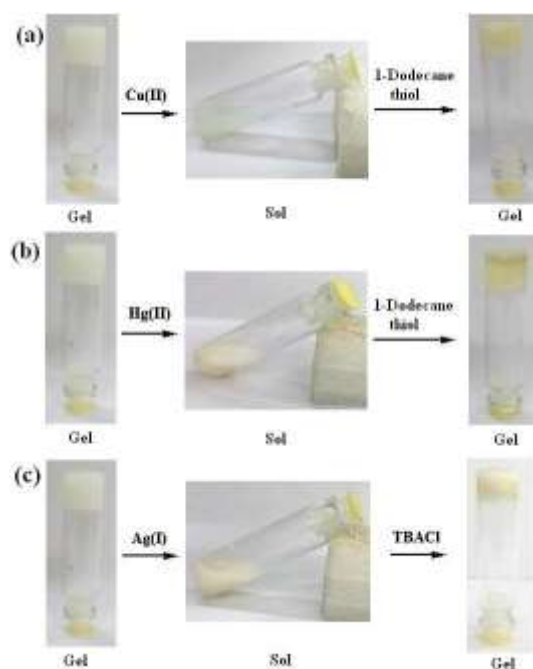

**Fig. S6.** Chemical responsiveness of the gel of **2** [15 mg/ mL in CHCl<sub>3</sub>: MeOH (2:1, v/v)] on successive addition of (a) Cu<sup>2+</sup> (*c* = 0.2 M, 5 equiv.) and 1-dodecanethiol (*c* = 0.2 M, 10 equiv.); (b) Hg<sup>2+</sup> (*c* = 0.2 M, 5 equiv.) and 1-dodecanethiol (*c* = 0.2 M, 10 equiv.) and (c) Ag<sup>+</sup> (*c* = 0.2 M, 5 equiv.) and TBACl (*c* = 0.2 M, 5 equiv.).

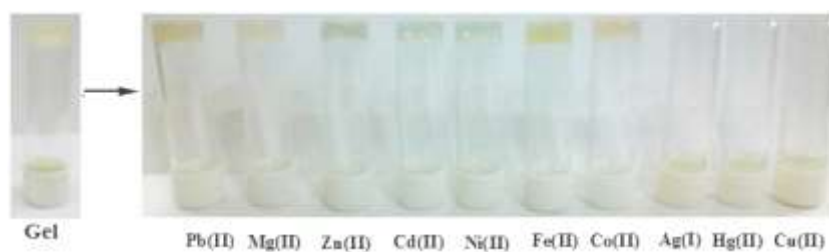

**Fig. S7.** Photograph showing the changes in the gel state of **3** (15 mg/ mL) when the gels were prepared with 5 equiv. amounts of different metal ions [*c* = 0.2 M in CHCl<sub>3</sub>:CH<sub>3</sub>OH (2:1, v/v) as perchlorate salt] in CHCl<sub>3</sub>:CH<sub>3</sub>OH (2:1, v/v). Similar observation was obtained when the CHCl<sub>3</sub>:CH<sub>3</sub>OH (2:1, v/v) gels of **3** were kept in contact with 0.5 mL of different metal solution [*c* = 0.2 M in CHCl<sub>3</sub>:CH<sub>3</sub>OH (2:1, v/v)].

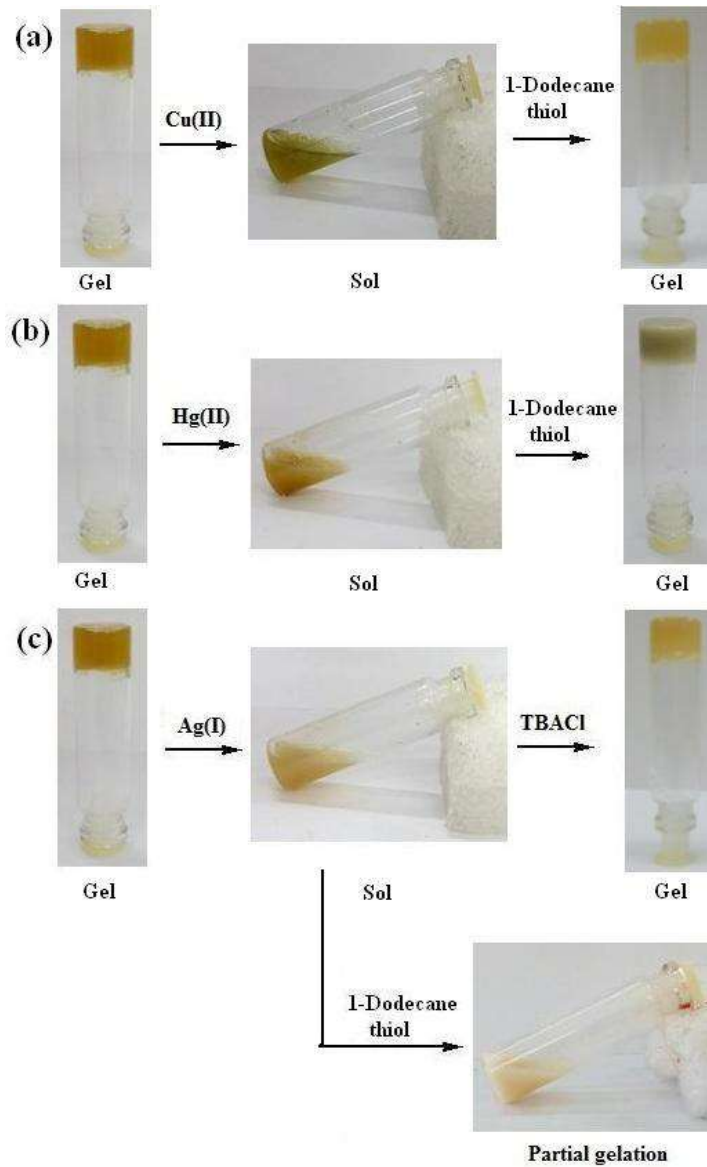

**Fig. S8.** Chemical responsiveness of the gel of **3** [15 mg/ mL in CHCl<sub>3</sub>: MeOH (2:1, v/v)] on successive addition of (a) Cu<sup>2+</sup> (*c* = 0.2 M, 5 equiv.) and 1-dodecanethiol (*c* = 0.2 M, 10 equiv.); (b) Hg<sup>2+</sup> (*c* = 0.2 M, 5 equiv.) and 1-dodecanethiol (*c* = 0.2 M, 10 equiv) and (c) Ag<sup>+</sup> (*c* = 0.2 M, 5 equiv.) and TBACl (*c* = 0.2 M, 5 equiv) and 1-dodecanethiol (in excess amounts).

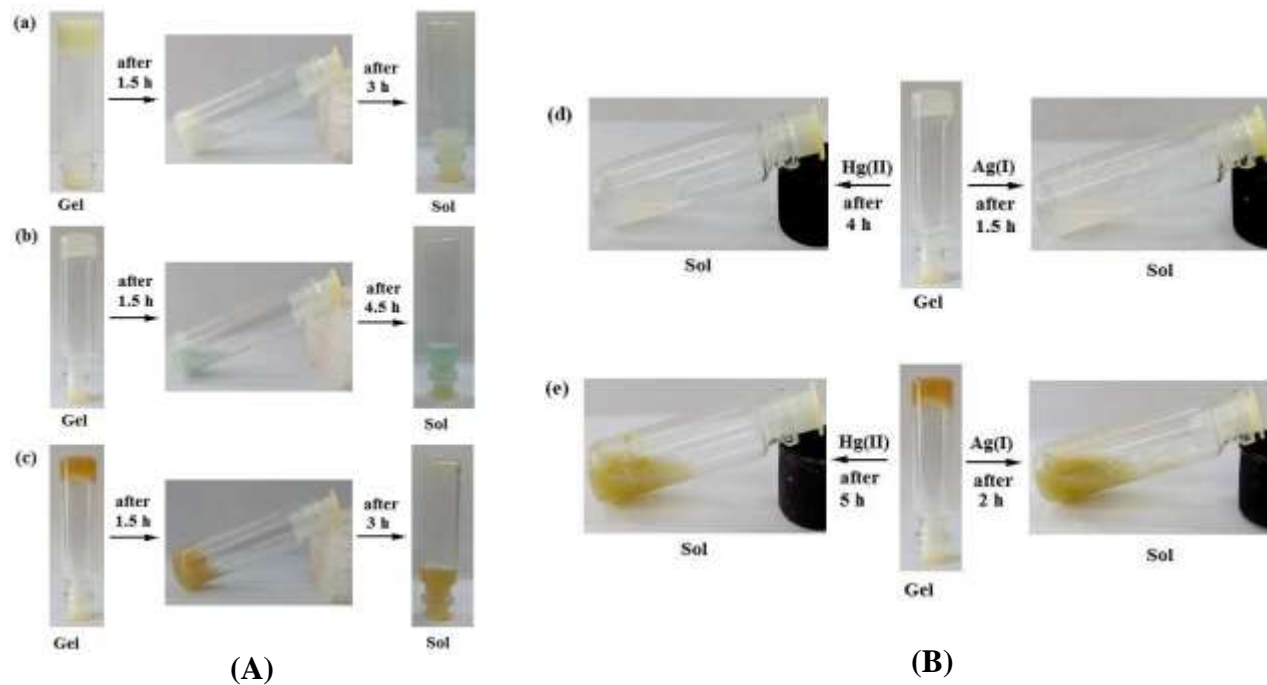

**Fig. S9.** (A) Pictorial representations of the phase changes of the gels of (a) **1**; (b) **2** and (c) **3** [15 mg/ mL in  $\text{CHCl}_3$ : MeOH (2:1, v/v)] in presence of 1 equiv. amounts of  $\text{Cu}^{2+}$  ( $c = 0.2 \text{ M}$ ) with time. (B) Pictorial representations of the phase changes of the gels of (d) **2** and (e) **3** [15 mg/ mL in  $\text{CHCl}_3$ : MeOH (2:1, v/v)] in presence of 1 equiv. amount of respective metal ions ( $c = 0.2 \text{ M}$ ) with time.

# Change in emission of 3 in CH<sub>3</sub>CN: CHCl<sub>3</sub> (4:1, v/v).

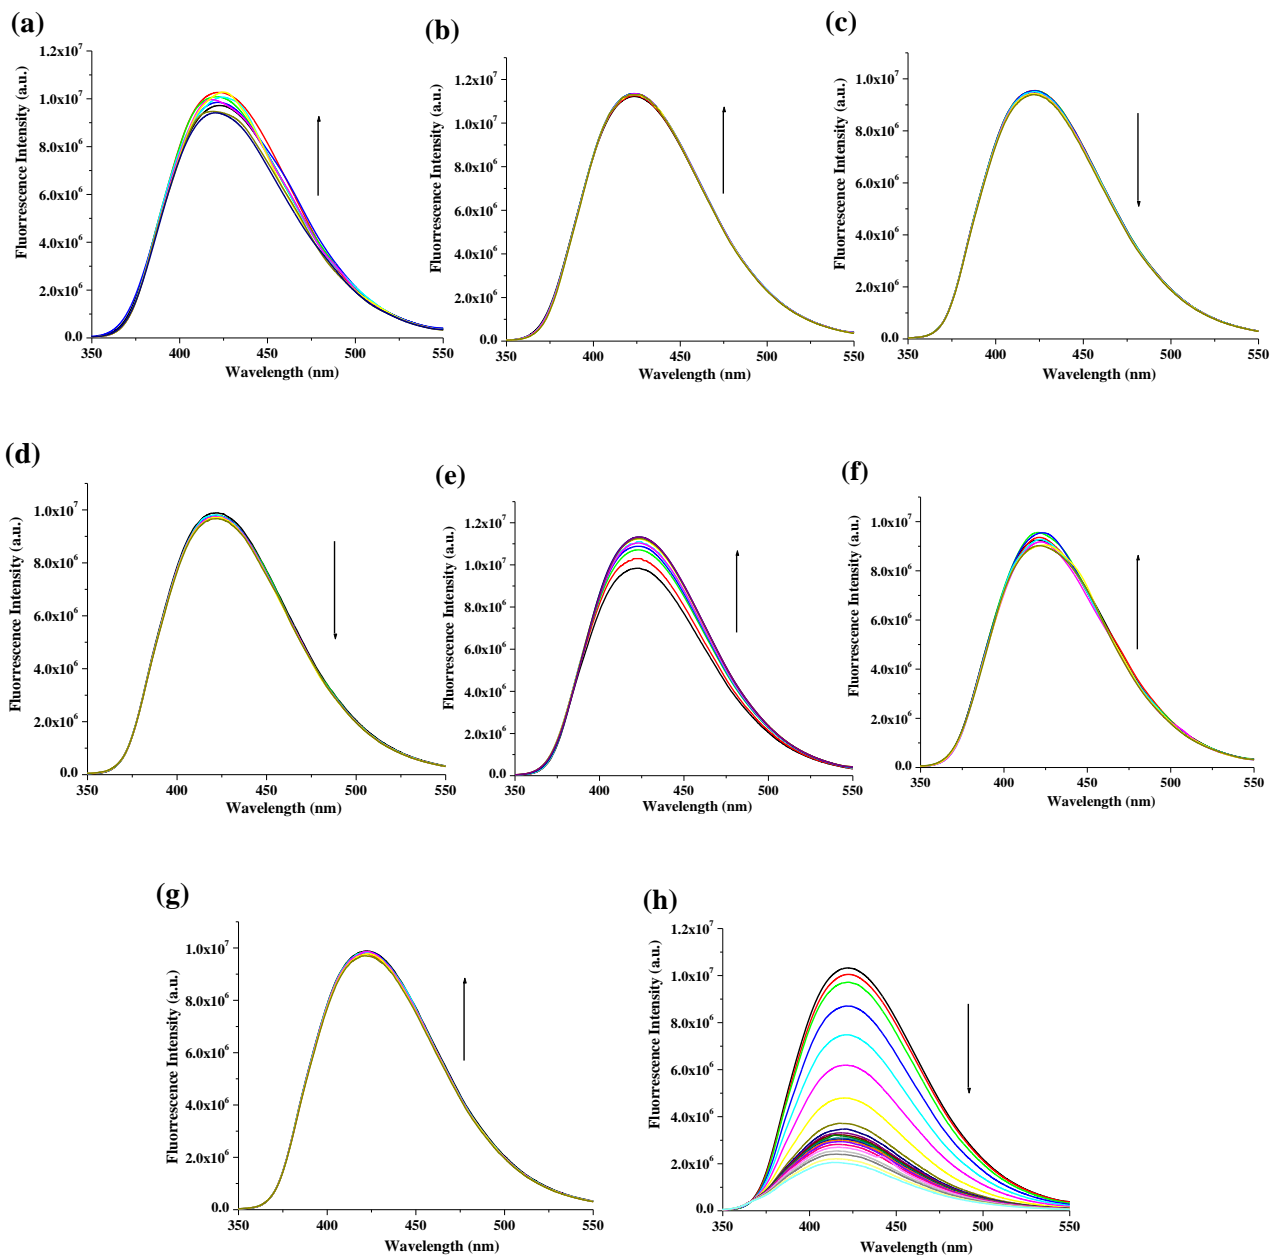

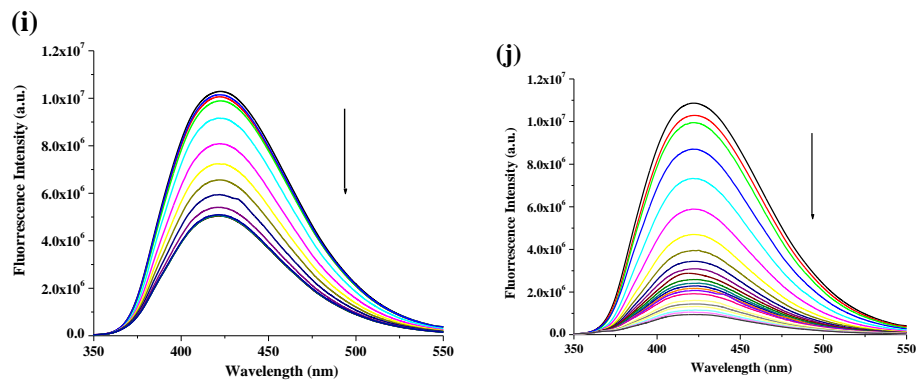

**Fig. S10.** Change in emission of **3** ( $c = 2.0 \times 10^{-5}$  M) upon addition of 5 equiv. amount of (a)  $\text{Pb}^{2+}$ , (b)  $\text{Mg}^{2+}$ , (c)  $\text{Co}^{2+}$ , (d)  $\text{Ni}^{2+}$ , (e)  $\text{Zn}^{2+}$ , (f)  $\text{Cd}^{2+}$ , (g)  $\text{Fe}^{2+}$ , (h)  $\text{Hg}^{2+}$ , (i)  $\text{Ag}^+$ , (j)  $\text{Cu}^{2+}$  ( $c = 8.0 \times 10^{-4}$  M) in  $\text{CH}_3\text{CN}:\text{CHCl}_3$  (4:1, v/v).

### Job plot

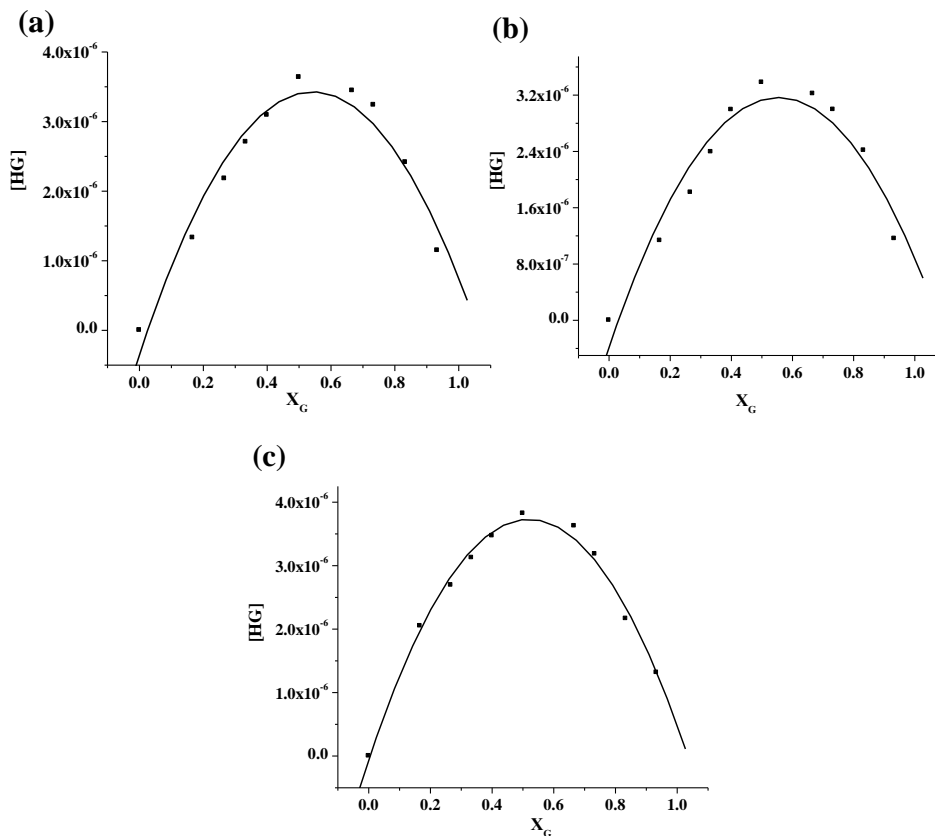

**Fig. S11.** Job plot of receptor **3** ( $c = 2.0 \times 10^{-5}$  M) with (a)  $\text{Hg}^{2+}$ , (b)  $\text{Ag}^+$  and (c)  $\text{Cu}^{2+}$  from fluorescence.



## Job plot

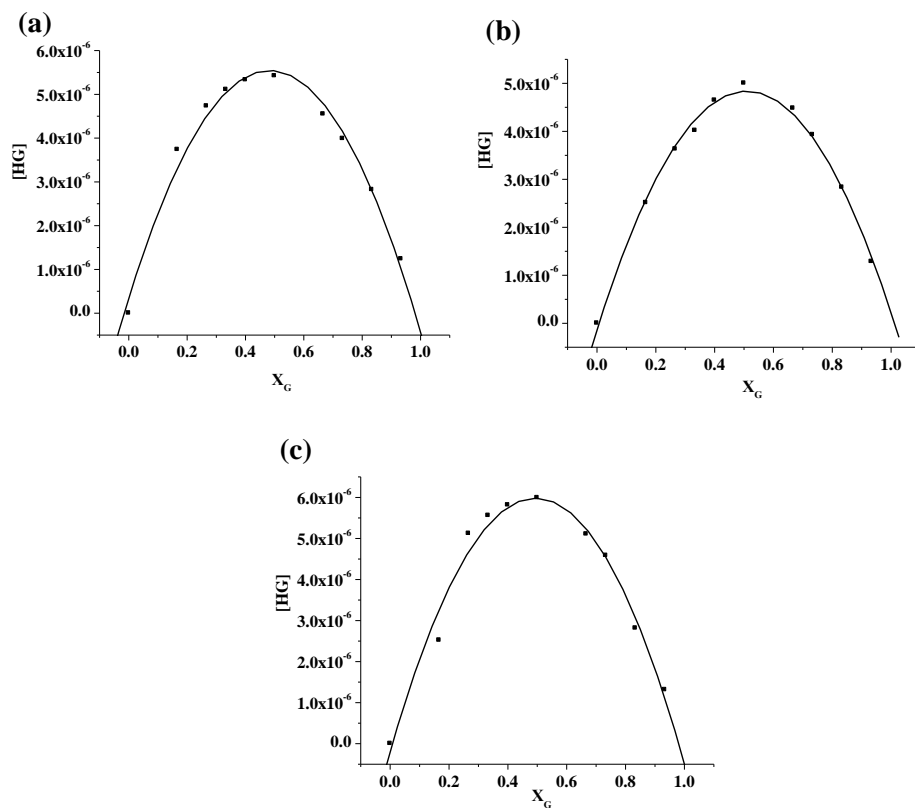

**Fig. S12.** Job plot of receptor **3** ( $c = 2.0 \times 10^{-5}$  M) with (a) Hg<sup>2+</sup>, (b) Ag<sup>+</sup> and (c) Cu<sup>2+</sup> from UV.

## Change in absorbance of 3 in CH<sub>3</sub>CN: CHCl<sub>3</sub> (4:1, v/v).

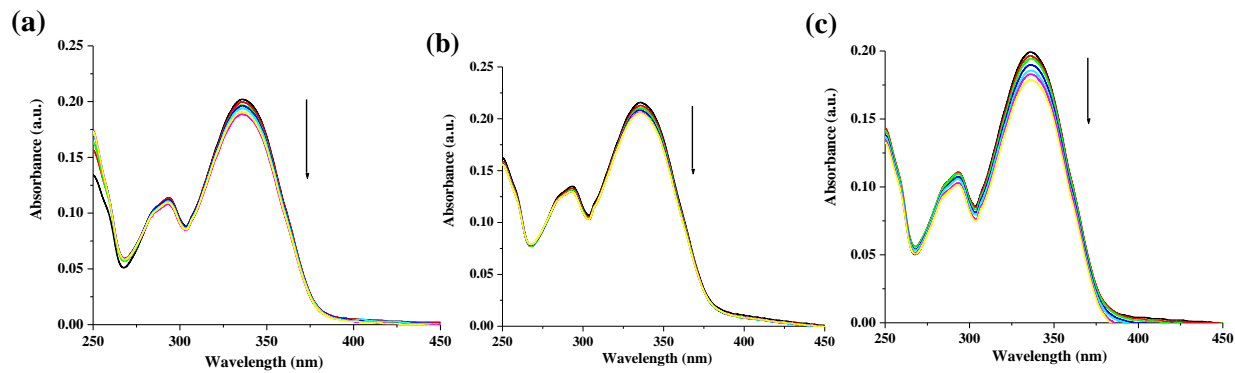

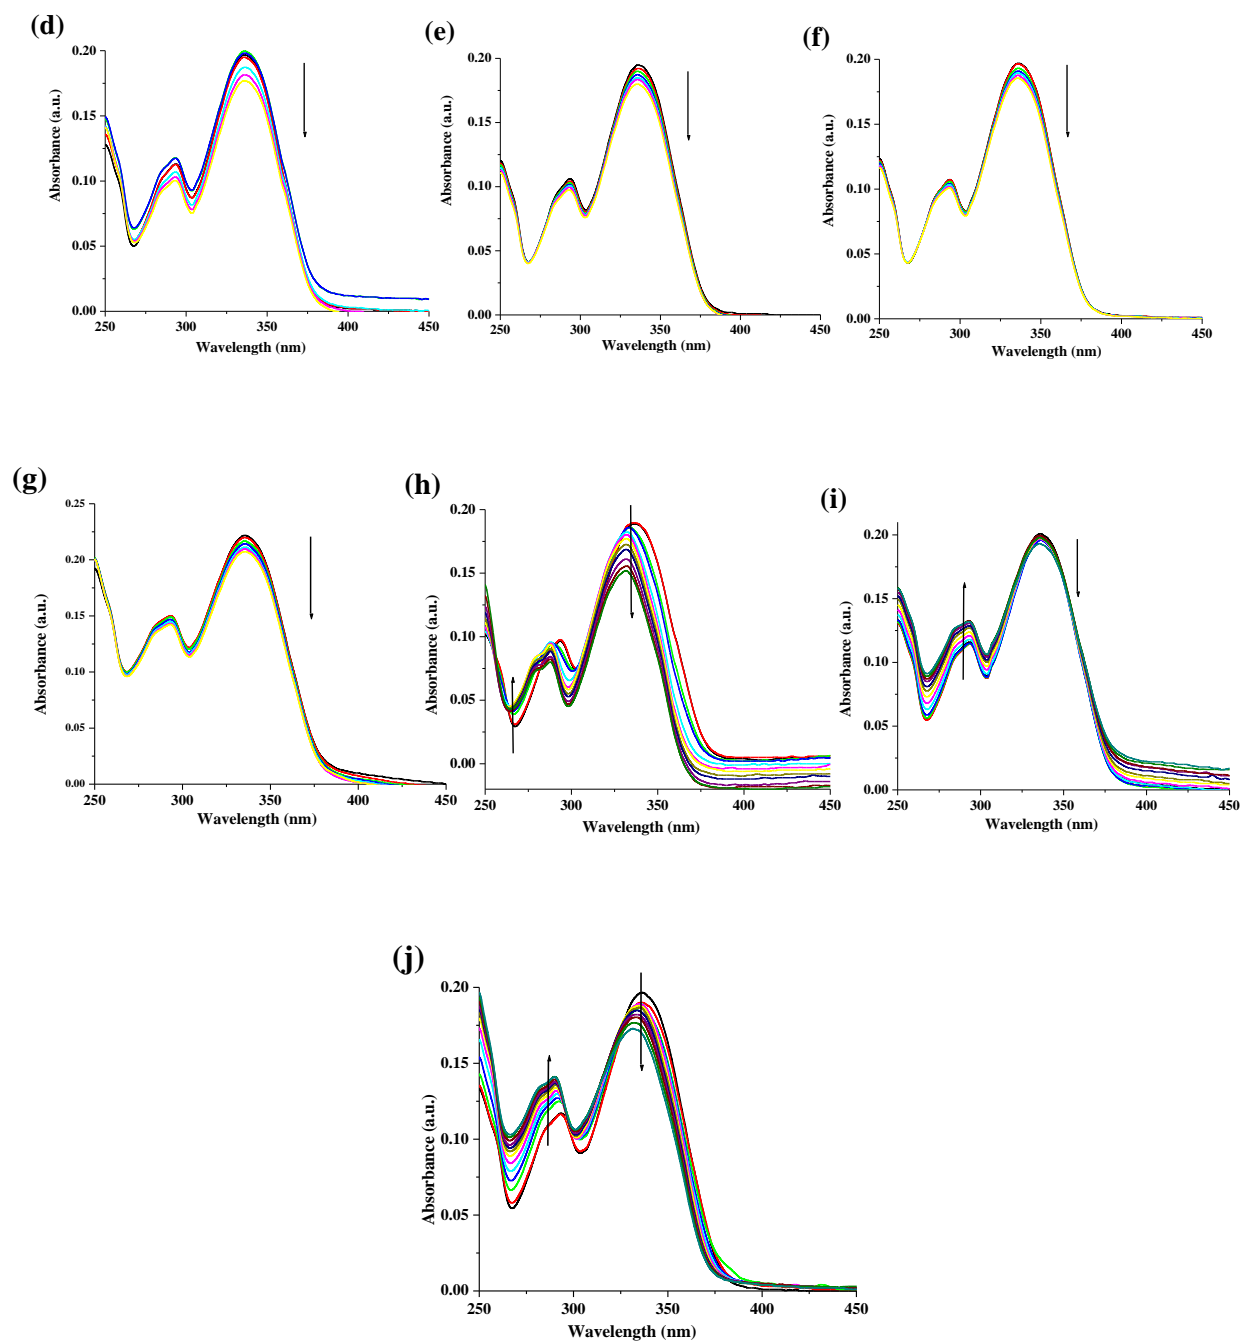

**Fig. S13.** Change in absorbance of **3** ( $c = 2.0 \times 10^{-5}$  M) upon addition of 5 equiv. amount of (a)  $\text{Pb}^{2+}$ , (b)  $\text{Mg}^{2+}$ , (c)  $\text{Co}^{2+}$ , (d)  $\text{Ni}^{2+}$ , (e)  $\text{Zn}^{2+}$ , (f)  $\text{Cd}^{2+}$ , (g)  $\text{Fe}^{2+}$ , (h)  $\text{Hg}^{2+}$ , (i)  $\text{Ag}^{+}$ , (j)  $\text{Cu}^{2+}$  ( $c = 8.0 \times 10^{-4}$  M) in  $\text{CH}_3\text{CN}:\text{CHCl}_3$  (4:1, v/v).

# Change in absorbance of 1 in CH<sub>3</sub>CN: CHCl<sub>3</sub> (4:1, v/v)

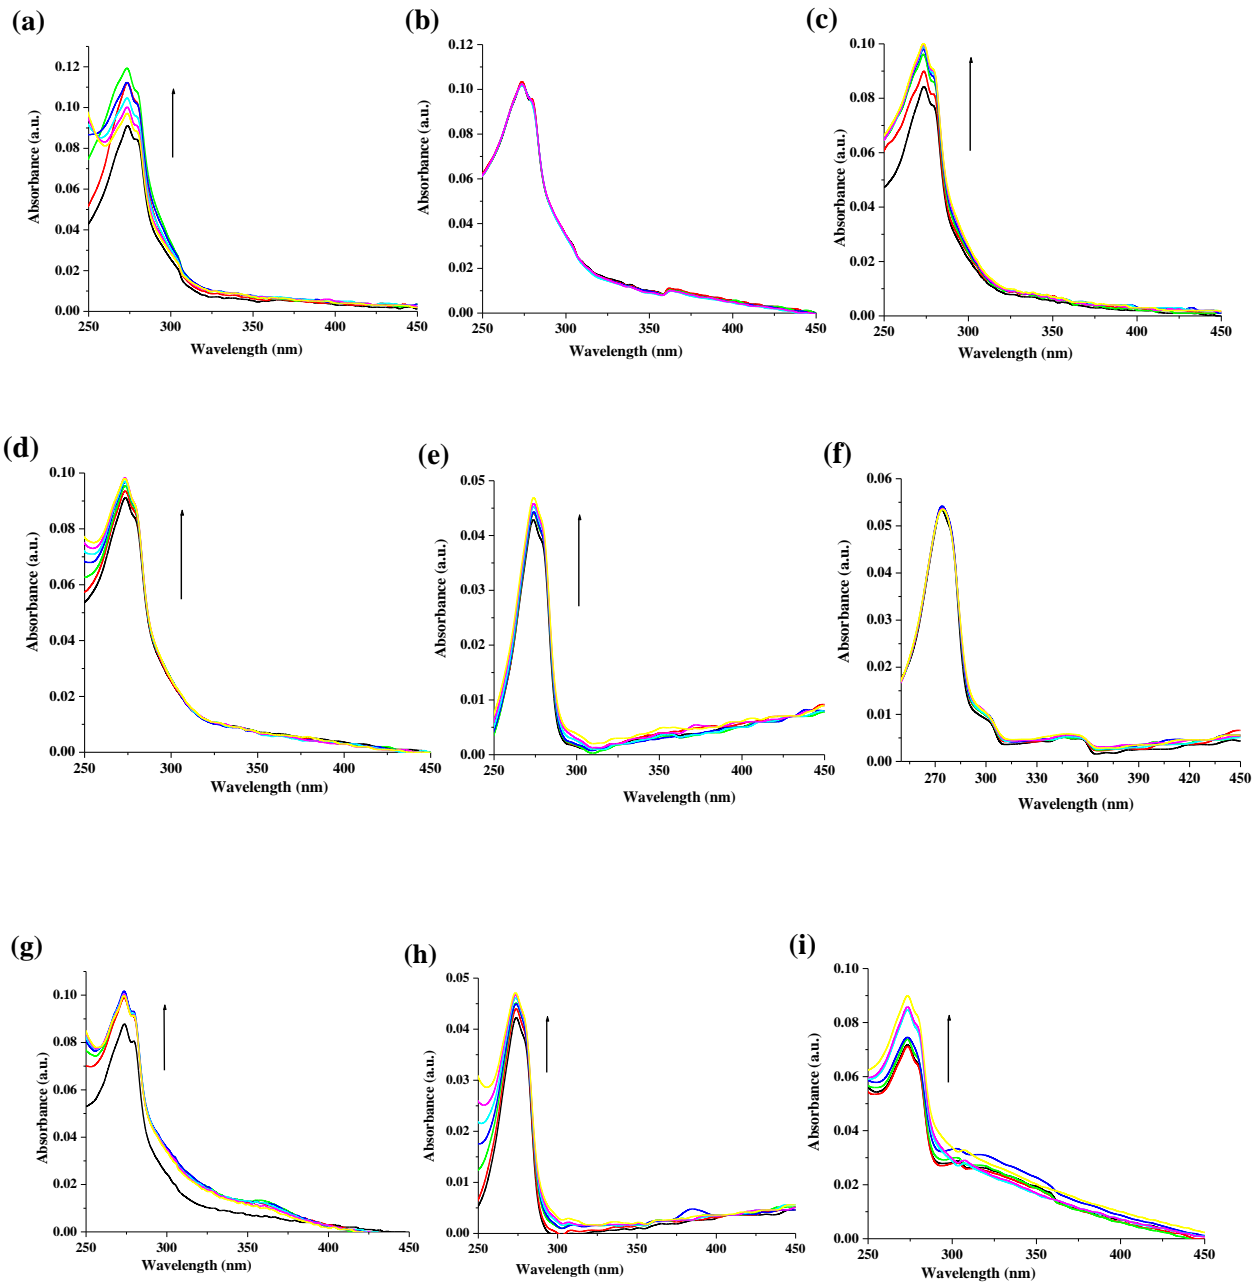

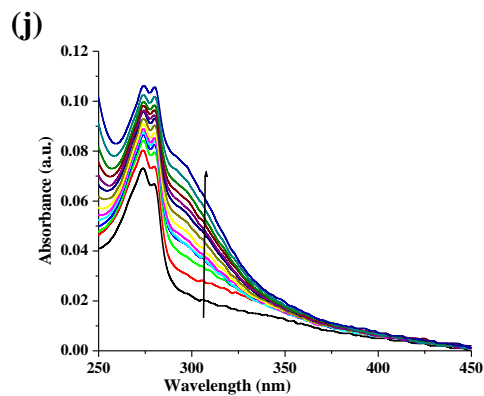

**Fig. S14.** Change in absorbance of **1** ( $c = 2.0 \times 10^{-5}$  M) upon addition of 5 equiv. amount of (a)  $\text{Pb}^{2+}$ , (b)  $\text{Mg}^{2+}$ , (c)  $\text{Co}^{2+}$ , (d)  $\text{Ni}^{2+}$ , (e)  $\text{Zn}^{2+}$ , (f)  $\text{Cd}^{2+}$ , (g)  $\text{Fe}^{2+}$ , (h)  $\text{Hg}^{2+}$ , (i)  $\text{Ag}^+$ , (j)  $\text{Cu}^{2+}$  ( $c = 8.0 \times 10^{-4}$  M) in  $\text{CH}_3\text{CN}:\text{CHCl}_3$  (4:1, v/v).

### Change in absorbance of **2** in $\text{CH}_3\text{CN}:\text{CHCl}_3$ (4:1, v/v)

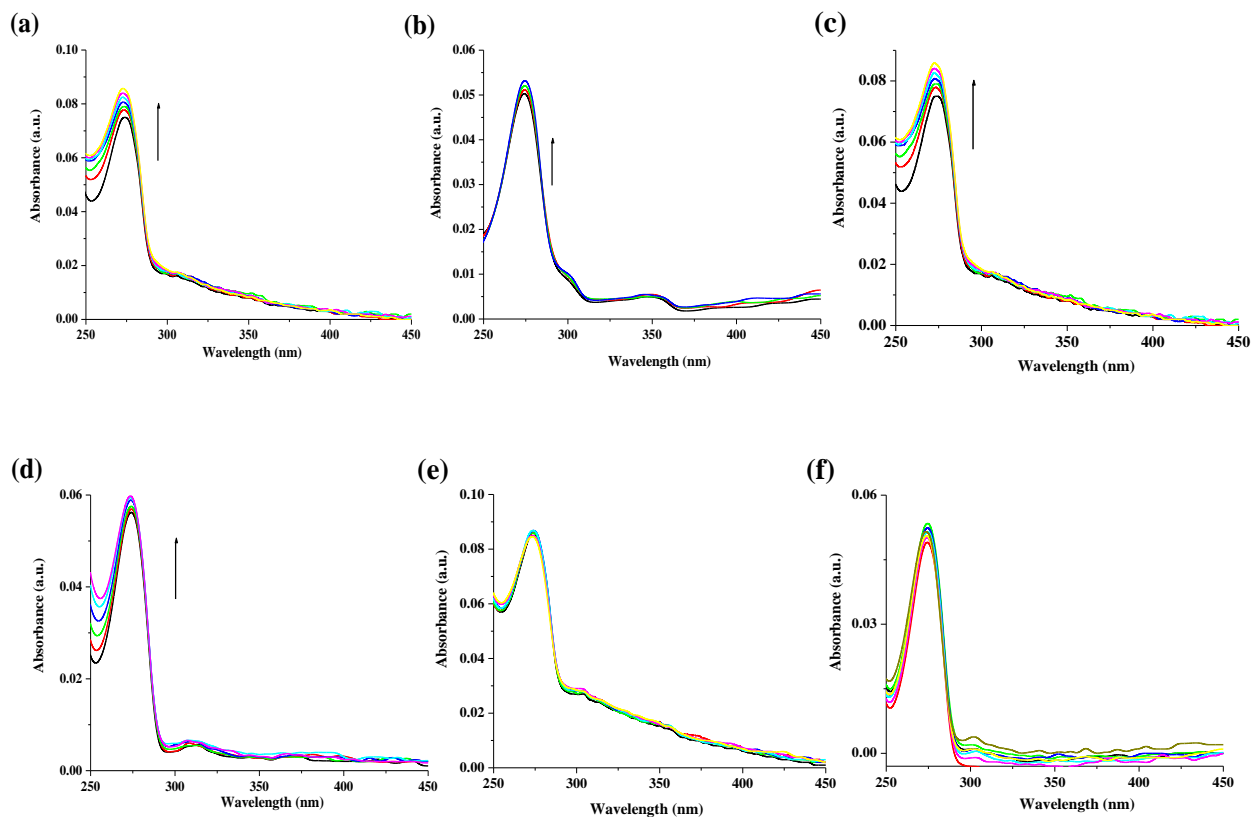

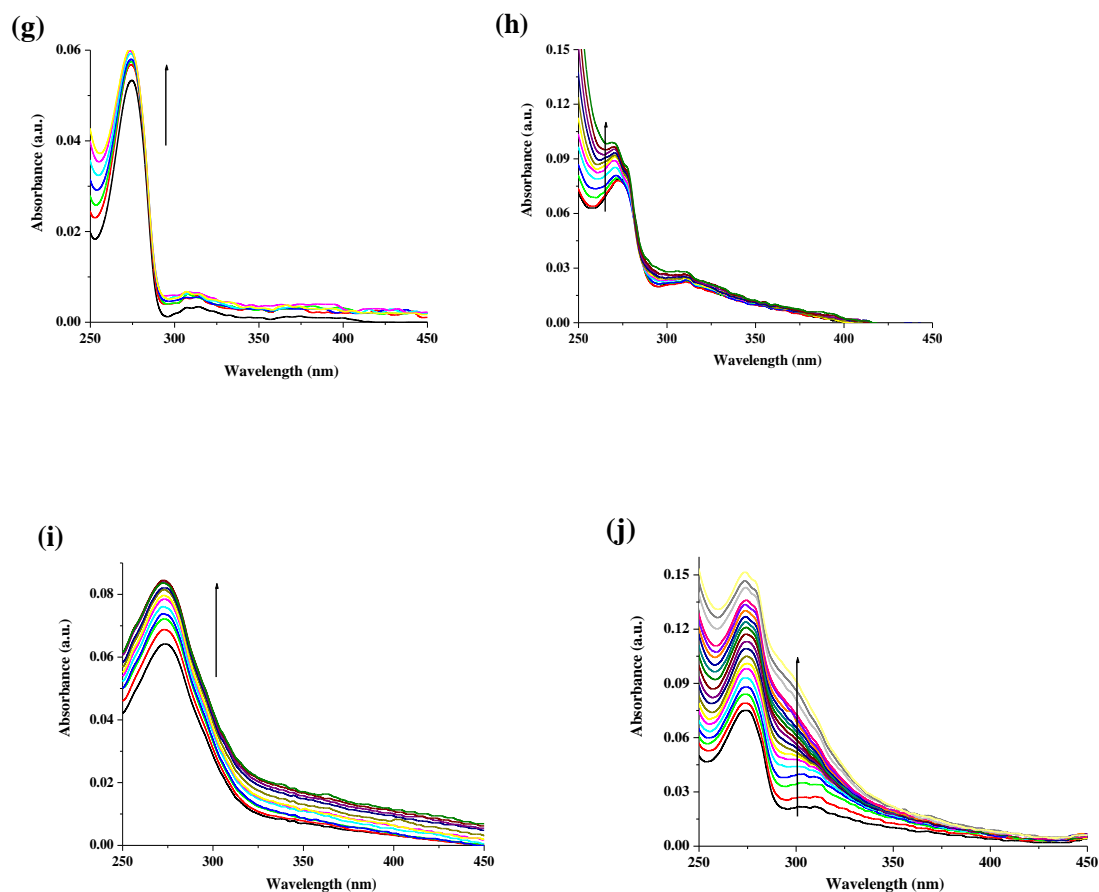

**Fig. S15.** Change in absorbance of **2** ( $c = 2.0 \times 10^{-5}$  M) upon addition of 5 equiv. amount of (a)  $\text{Pb}^{2+}$ , (b)  $\text{Mg}^{2+}$ , (c)  $\text{Co}^{2+}$ , (d)  $\text{Ni}^{2+}$ , (e)  $\text{Zn}^{2+}$ , (f)  $\text{Cd}^{2+}$ , (g)  $\text{Fe}^{2+}$ , (h)  $\text{Hg}^{2+}$ , (i)  $\text{Ag}^+$ , (j)  $\text{Cu}^{2+}$  ( $c = 8.0 \times 10^{-4}$  M) in  $\text{CH}_3\text{CN}:\text{CHCl}_3$  (4:1, v/v).

## Non liner binding constant curve from fluorescence

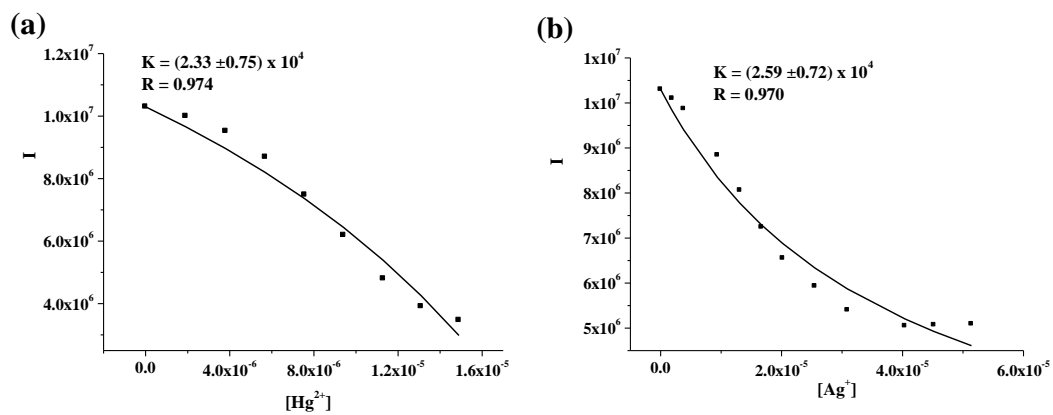

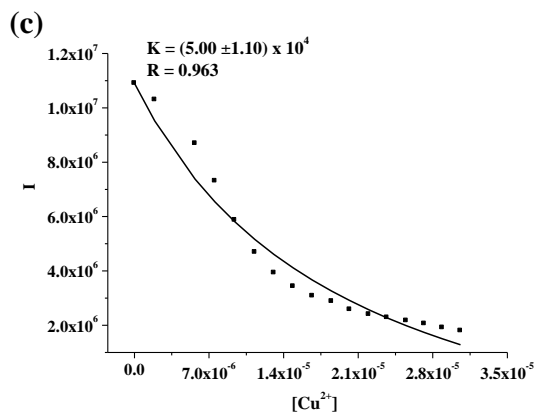

**Fig. S16.** Non liner binding constant curve for **3** ( $c = 2.0 \times 10^{-5}$  M) with (a)  $\text{Hg}^{2+}$ , (b)  $\text{Ag}^+$  and (c)  $\text{Cu}^{2+}$  ( $c = 8.0 \times 10^{-4}$  M) in  $\text{CH}_3\text{CN}:\text{CHCl}_3$  (4:1, v/v) from fluorescence.

### Non liner binding constant curve from UV

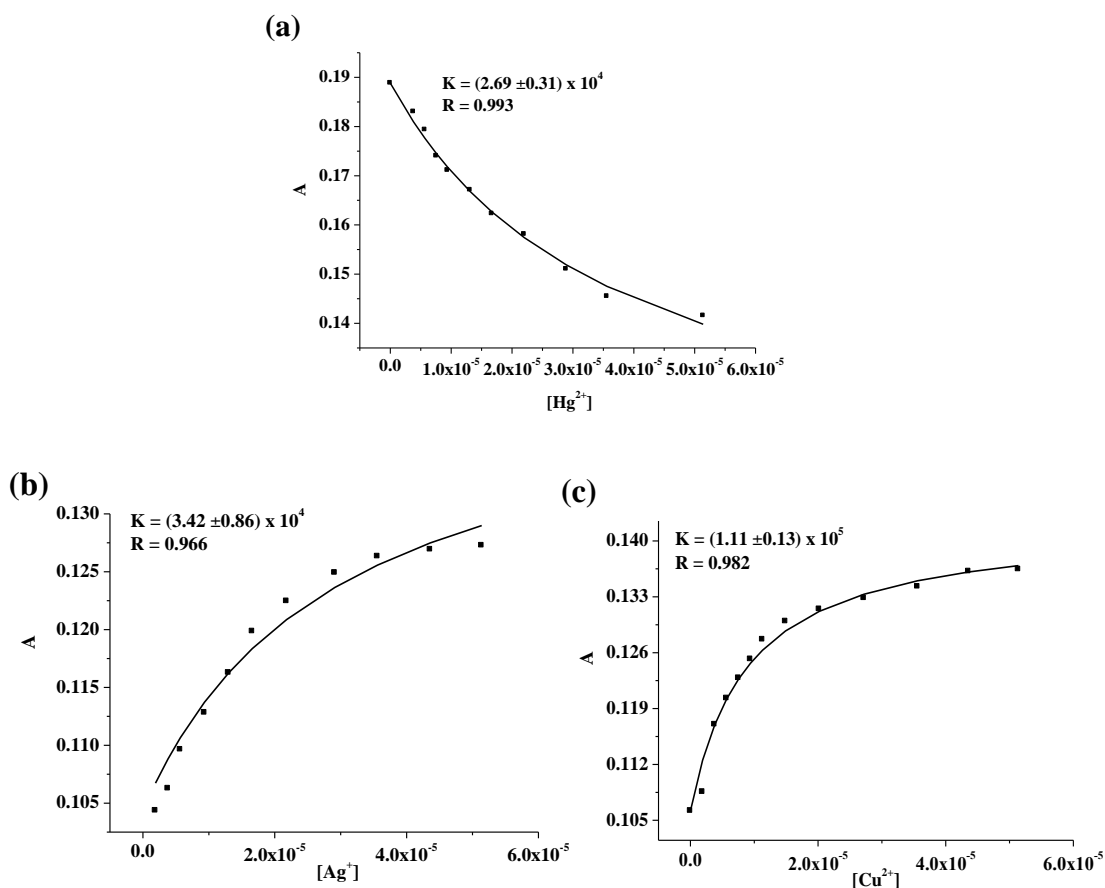

**Fig. S17.** Non liner binding constant curve for **3** ( $c = 2.0 \times 10^{-5}$  M) with (a)  $\text{Hg}^{2+}$ , (b)  $\text{Ag}^+$  and (c)  $\text{Cu}^{2+}$  ( $c = 8.0 \times 10^{-4}$  M) in  $\text{CH}_3\text{CN}:\text{CHCl}_3$  (4:1, v/v) from UV.

## Job plot

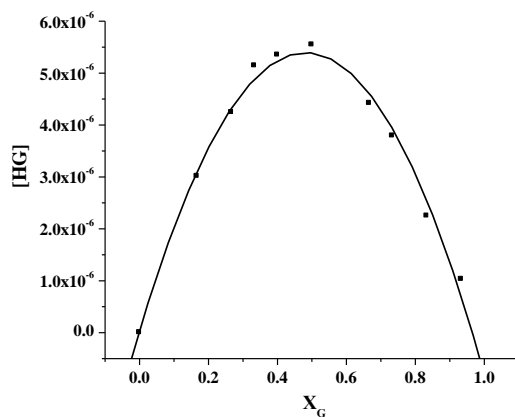

**Fig. S18.** Job plot of receptor **1** ( $c = 2.0 \times 10^{-5}$  M) with  $Cu^{2+}$  from UV.

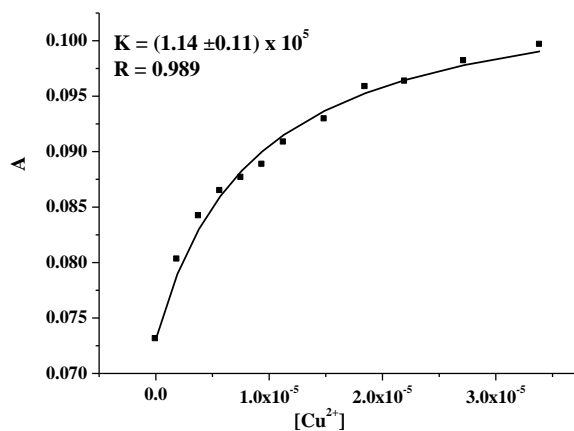

**Fig. S19.** Non linear binding constant curve for **1** ( $c = 2.0 \times 10^{-5}$  M) with  $Cu^{2+}$  ( $c = 8.0 \times 10^{-4}$  M) in  $CH_3CN:CHCl_3$  (4:1, v/v) from UV.

## Job plot

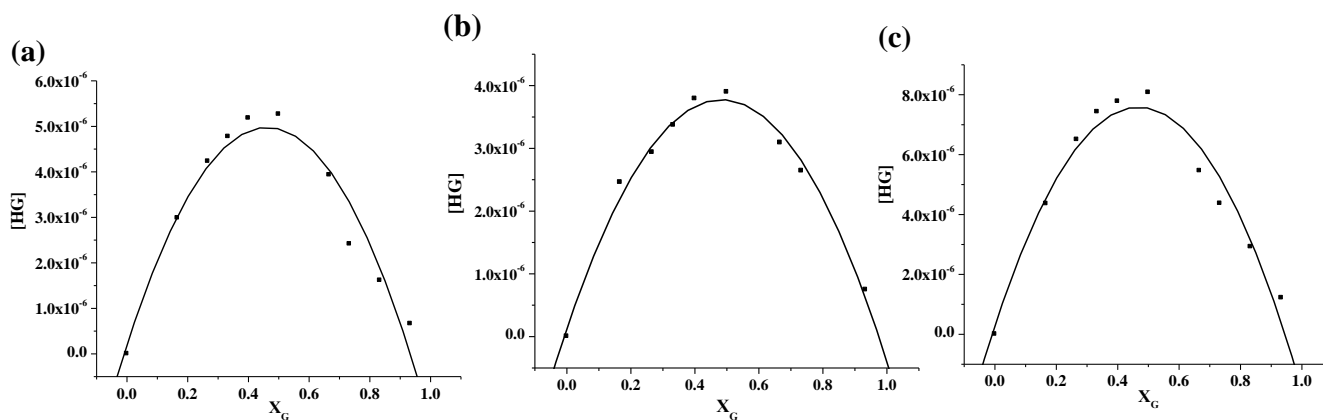

**Fig. S20.** Job plot of receptor **2** ( $c = 2.0 \times 10^{-5}$  M) with (a)  $Hg^{2+}$ , (b)  $Ag^+$  and (c)  $Cu^{2+}$  from UV.

## Non liner binding constant curve

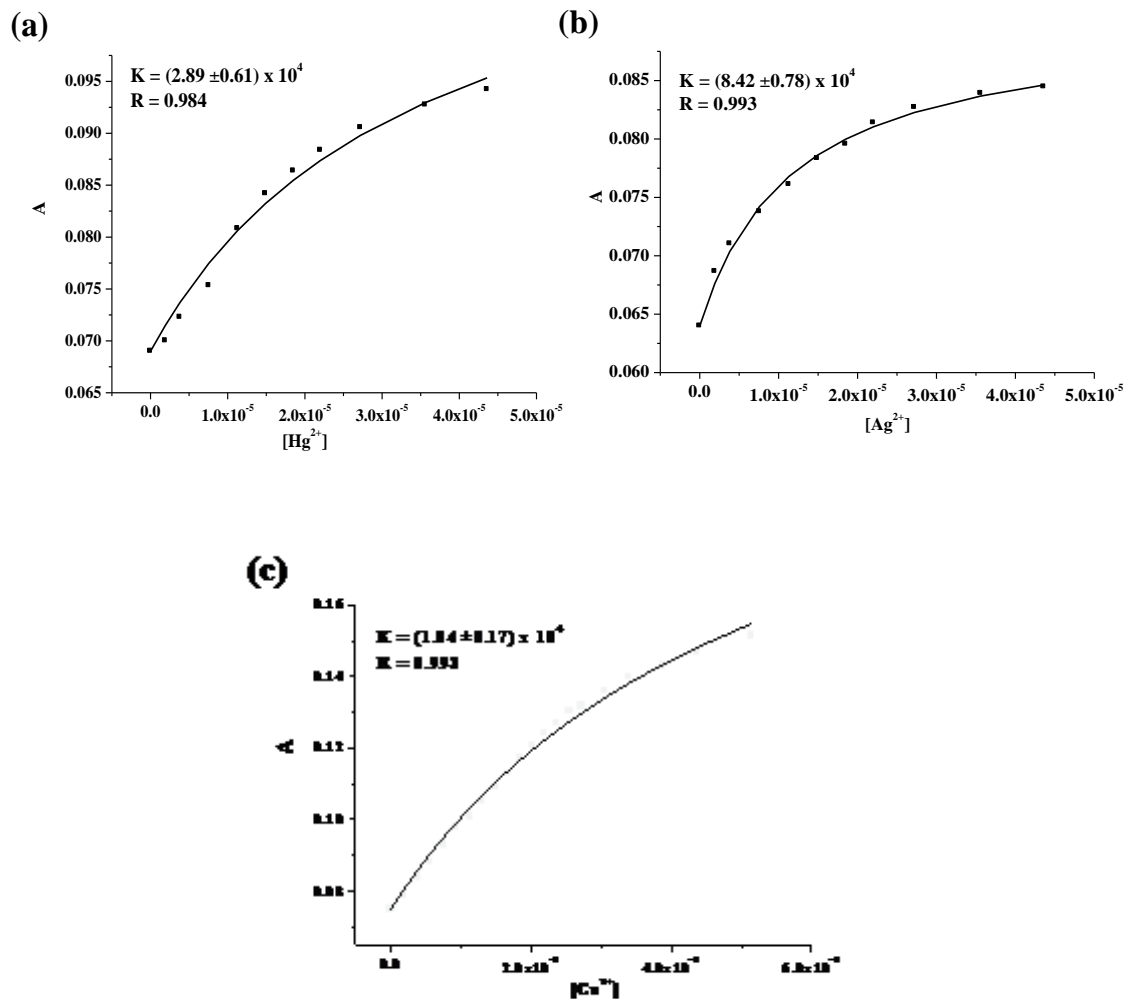

**Fig. S21.** Non liner binding constant curve for **2** ( $c = 2.0 \times 10^{-5}$  M) with (a)  $\text{Hg}^{2+}$ , (b)  $\text{Ag}^+$  and (c)  $\text{Cu}^{2+}$  ( $c = 8.0 \times 10^{-4}$  M) in  $\text{CH}_3\text{CN}:\text{CHCl}_3$  (4:1, v/v) from UV.



## $^1\text{H}$ NMR change with metal ions

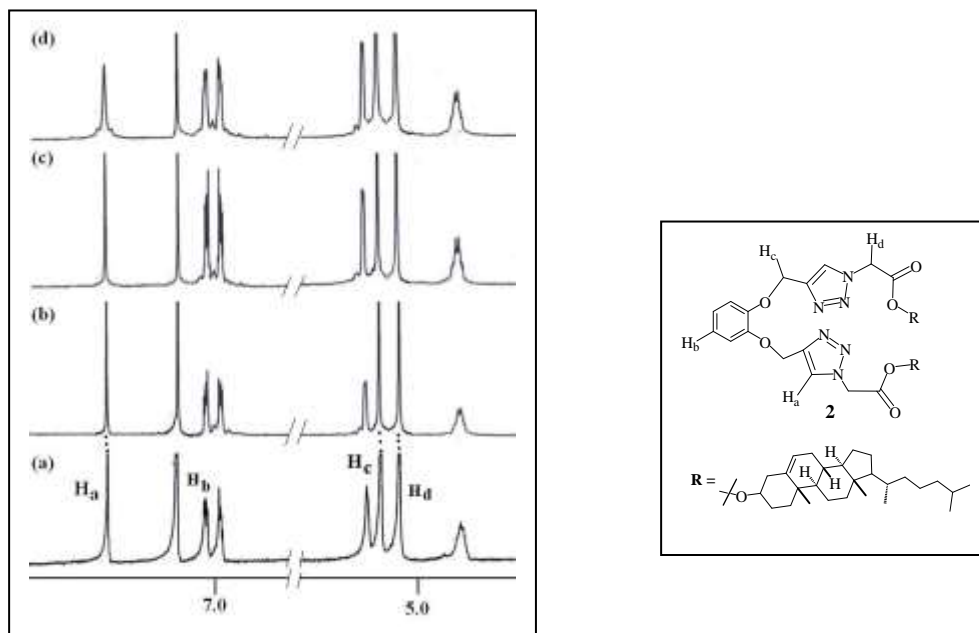

**Fig. S22.** Partial  $^1\text{H}$  NMR (400 MHz,  $\text{CDCl}_3$ ) of (a) compound **2** ( $c = 6.18 \times 10^{-3}$  M), (b) **2** with  $\text{Ag}^+$  (1:1), (c) **2** with  $\text{Hg}^{2+}$  (1:1) and (d) **2** with  $\text{Cu}^{2+}$  (1:1).

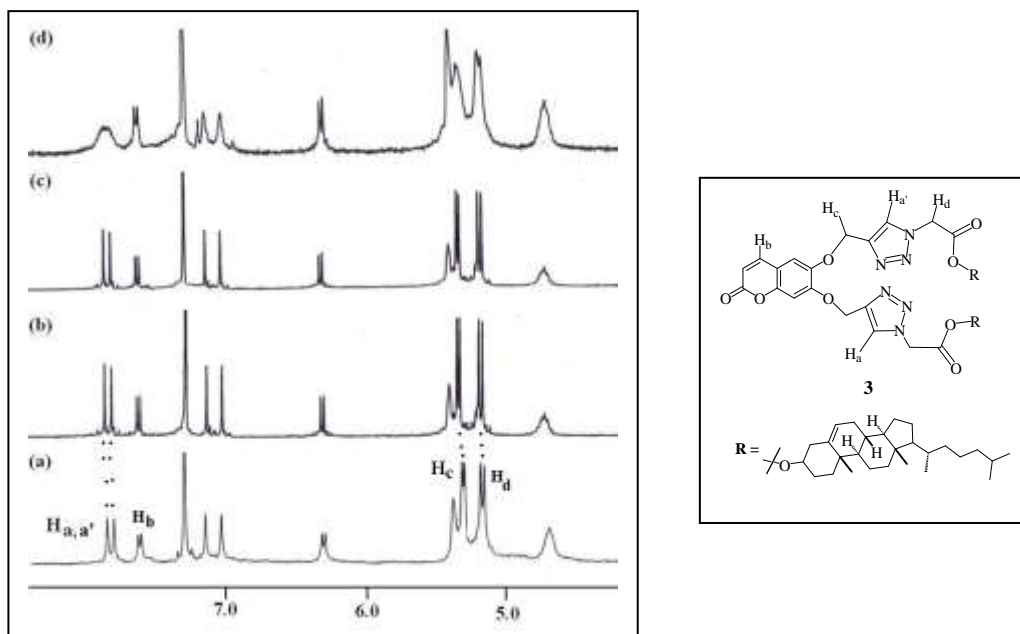

**Fig. S23.** Partial  $^1\text{H}$  NMR (400 MHz,  $\text{CDCl}_3$ ) of (a) compound **3** ( $c = 4.10 \times 10^{-3}$  M), (b) **3** with  $\text{Ag}^+$  (1:1), (c) **3** with  $\text{Hg}^{2+}$  (1:1) and (d) **3** with  $\text{Cu}^{2+}$  (1:1).

$^1\text{H}$  NMR ( $\text{CDCl}_3$ , 400 MHz)

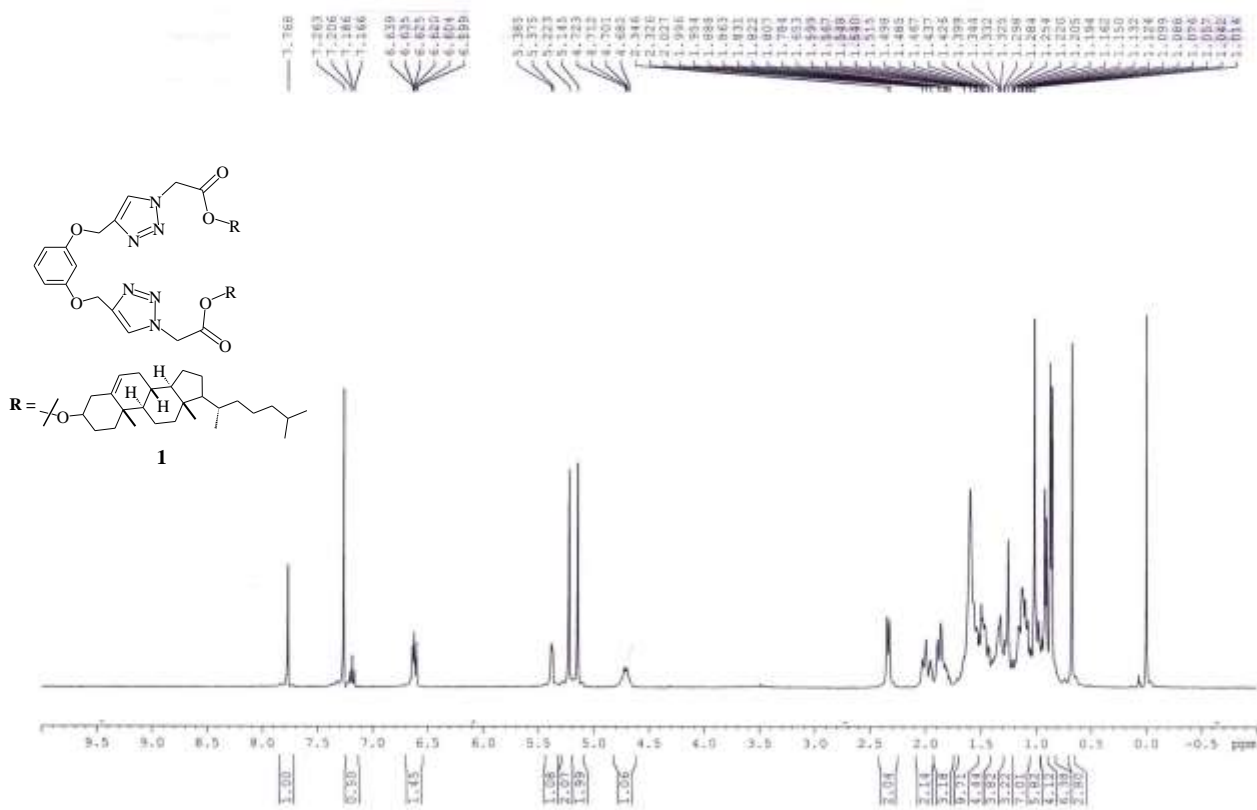



# Mass spectrum of 1.

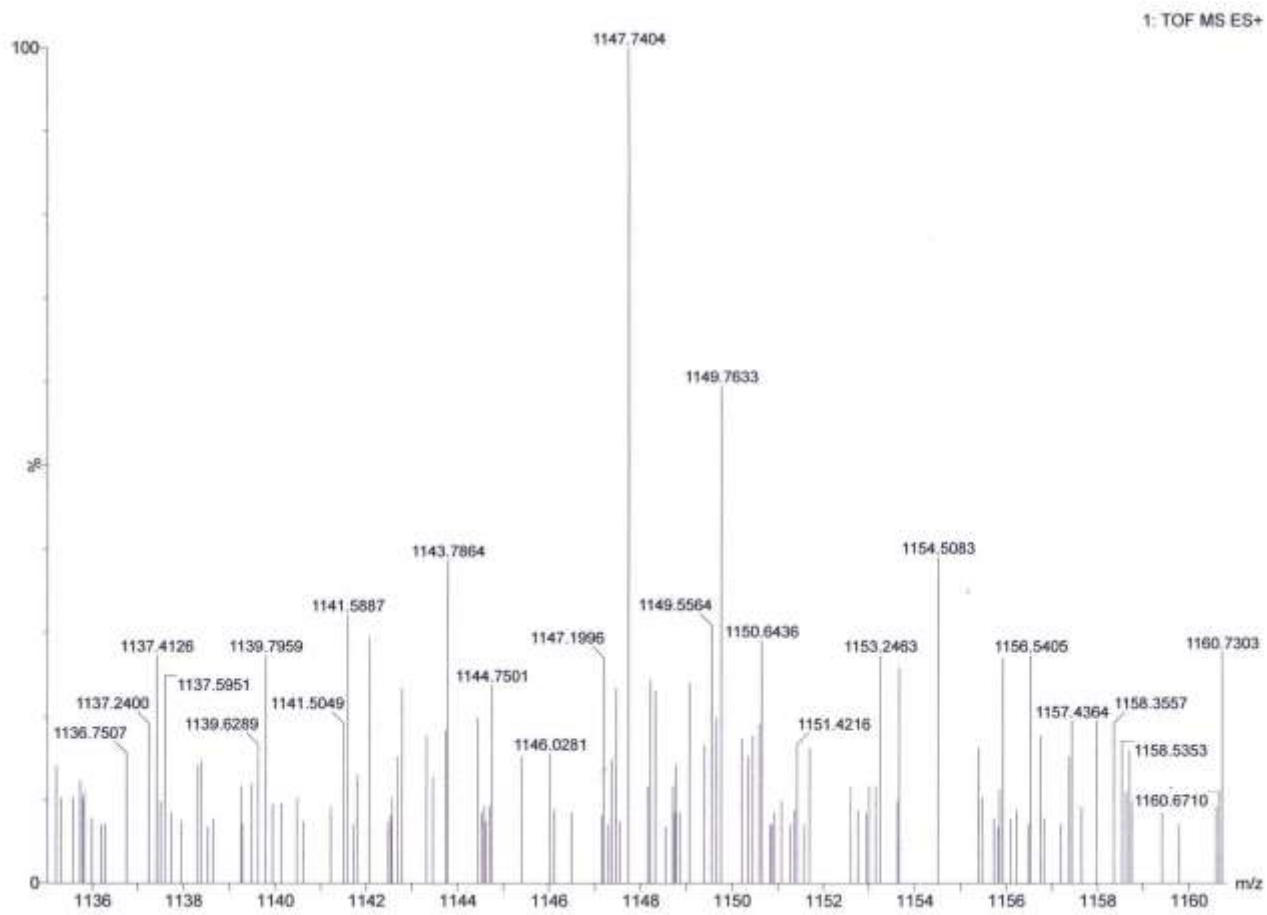



$^{13}\text{C}$  NMR (CDCl<sub>3</sub>, 100 MHz)

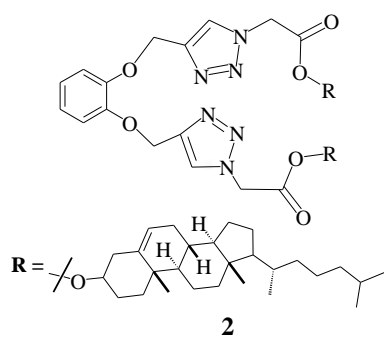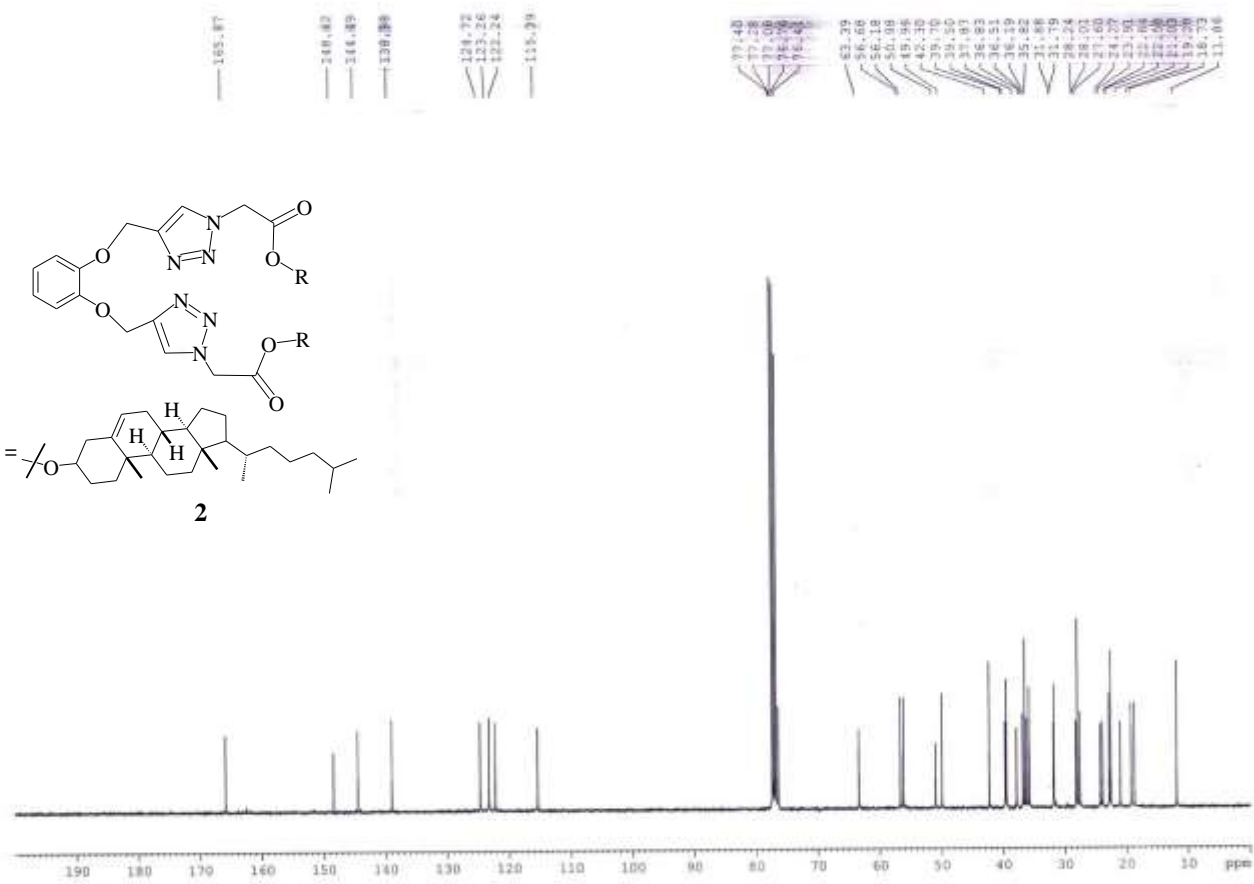

## Mass spectrum of 2.

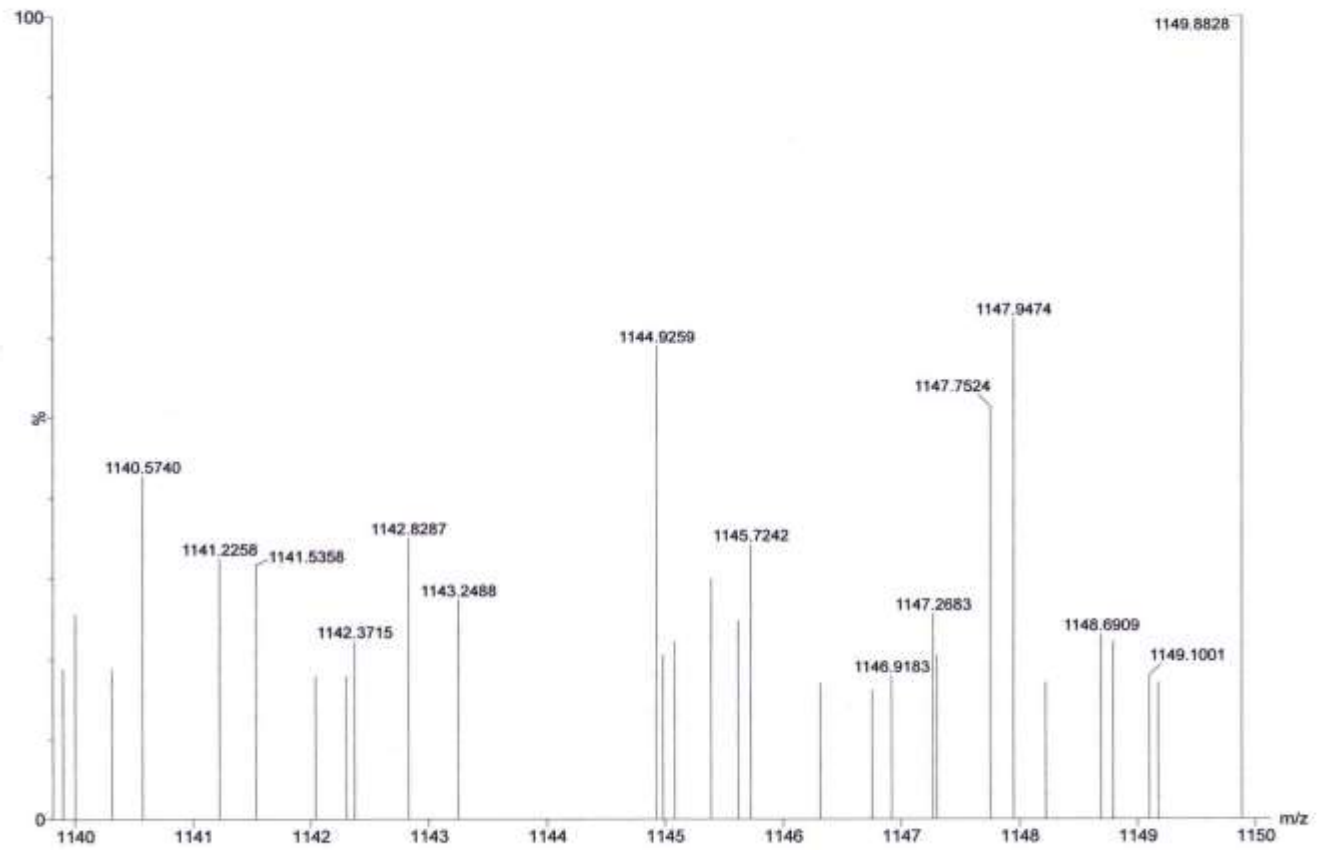

<sup>1</sup>H NMR (CDCl<sub>3</sub>, 400 MHz)

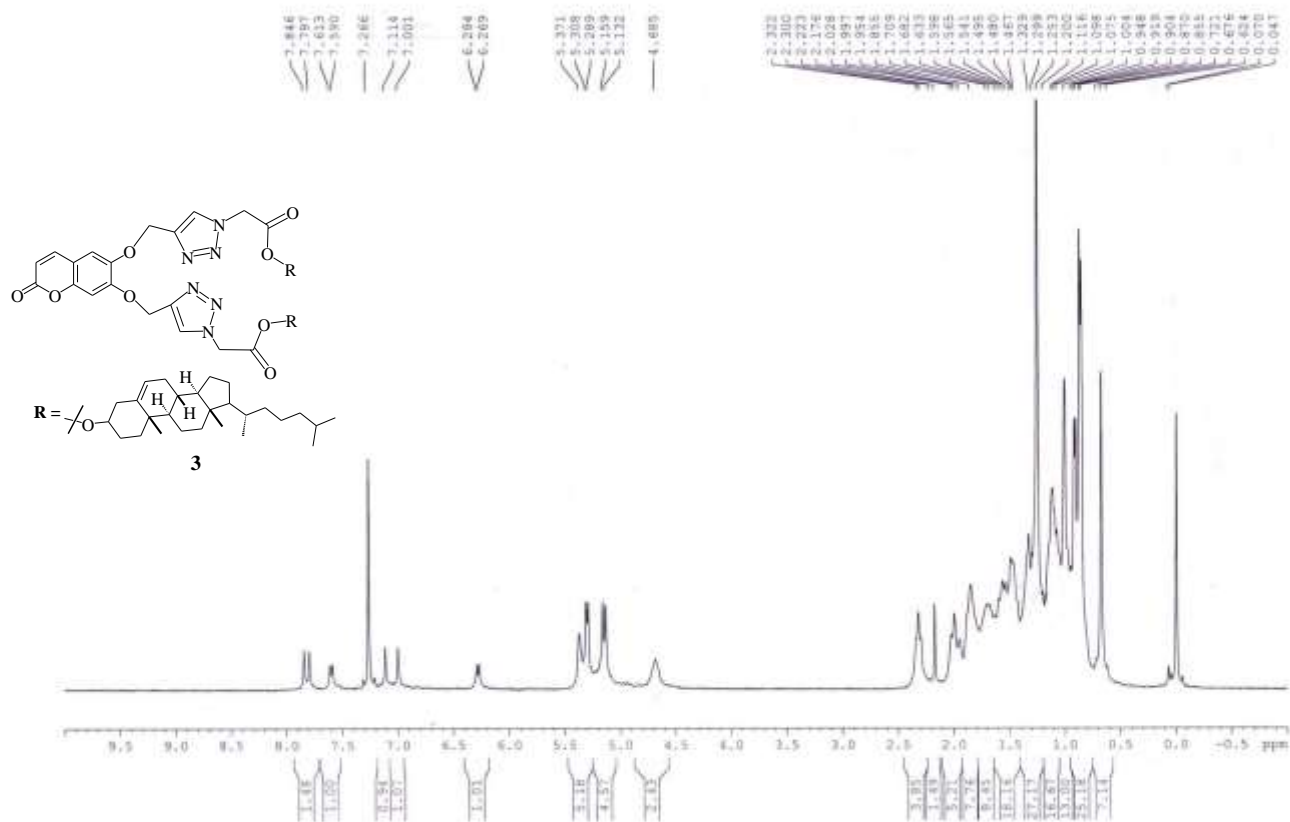



**$^{13}\text{C}$  NMR (CDCl<sub>3</sub>, 100 MHz)**

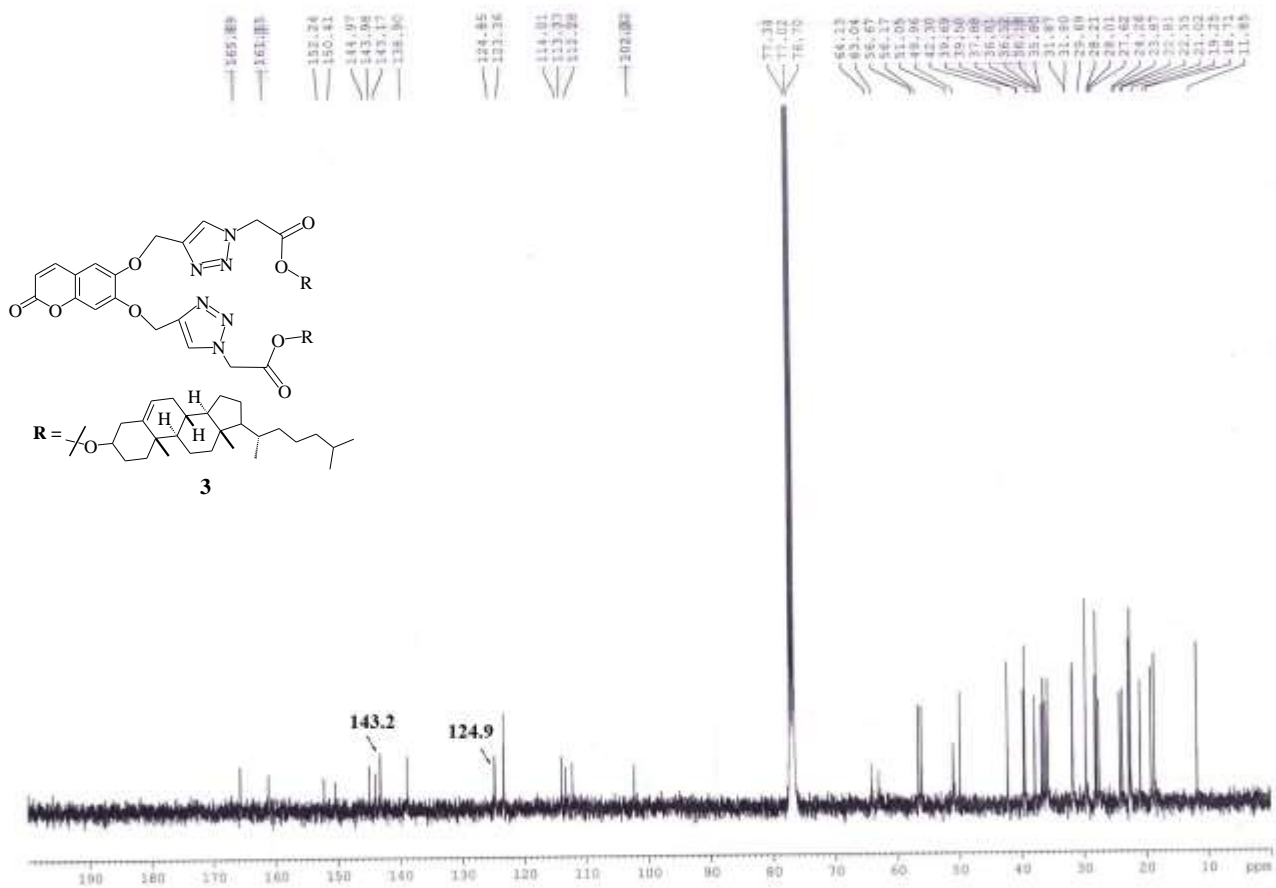

### Mass spectrum of 3.

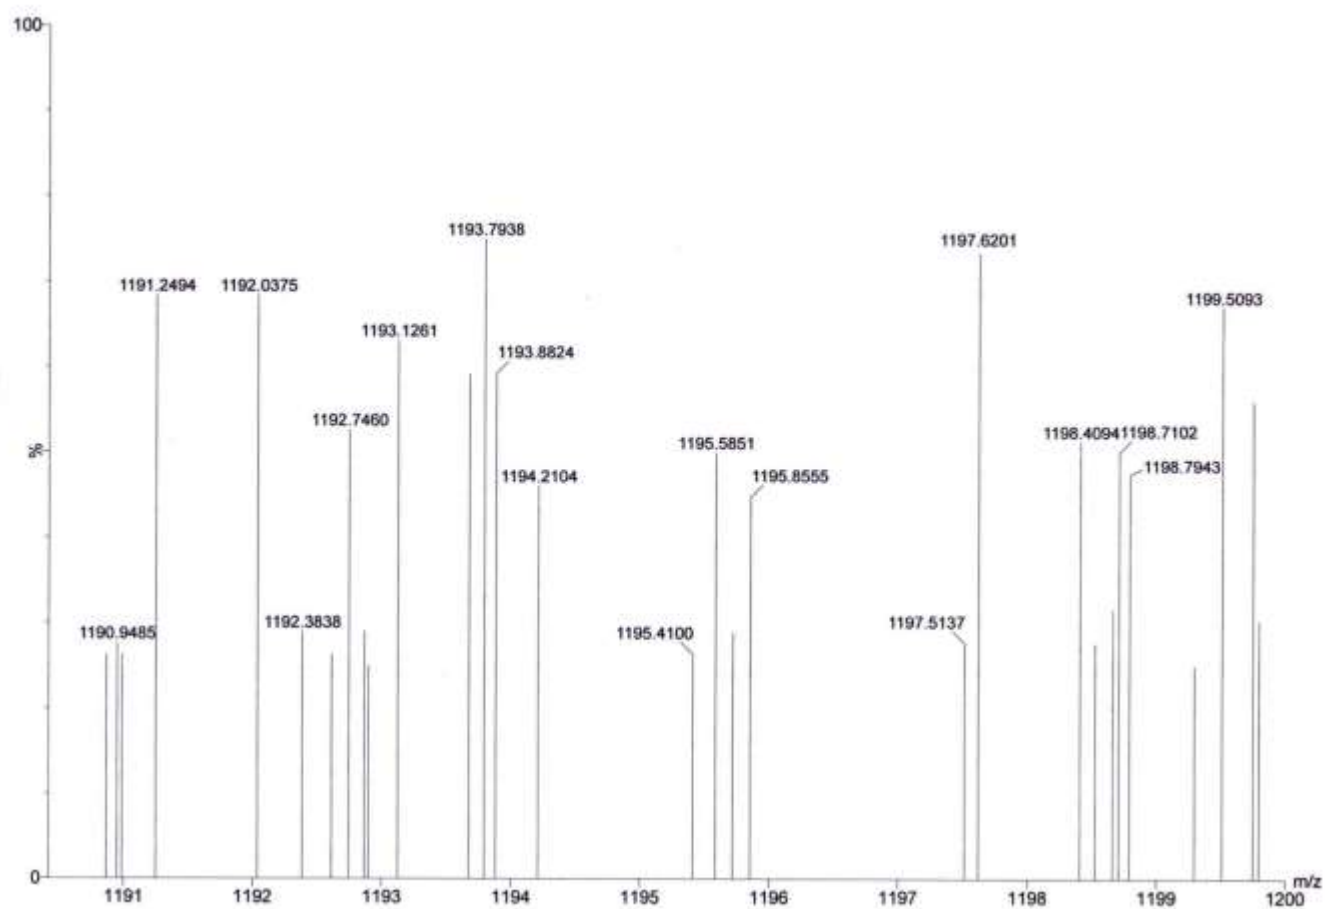

Supplement: c5nj02771c1.pdf [file c5nj02771c1.pdf]
